# Supplementary material for: Triple CoII, III, IV charge ordering and spin states in modular cobaltites: a systematization through experimental and virtual compounds
Source: Royal Society of Chemistry journal article supplement (doi:10.1039/c4tc01486c), 2014-01-01
Supplement: c4tc01486c1.pdf [file c4tc01486c1.pdf]

# Triple $\text{Co}^{\text{II, III, IV}}$ charge ordering and spin states in modular cobaltites:

## A systematization through experimental and virtual compounds

R. David<sup>a</sup>, H. Kabbour<sup>a\*</sup>, P. Bordet<sup>b,c</sup>, D. Pelloquin<sup>d</sup>, O. Leynaud<sup>b,c</sup>, M. Trentesaux<sup>a</sup> and O. Mentré<sup>a</sup>

<sup>a</sup>Unité de Catalyse et de Chimie du Solide, Université Lille Nord de France, Villeneuve d'Ascq, France

<sup>b</sup>Univ. Grenoble Alpes, Institut Néel, Grenoble, France

<sup>c</sup>CNRS, Institut Néel, Grenoble, France

<sup>d</sup>CRISMAT, Caen, France

### SUPPLEMENTARY INFORMATION

**S1:** Structures of several compounds within the homologous series with formulae  $[\text{BaCoO}_3]_n[\text{BaCo}_8\text{O}_{11}]$ : (a)  $n=1$   $\text{Ba}_2\text{Co}_9\text{O}_{14}$ , (b)  $n=2$   $\text{Ba}_3\text{Co}_{10}\text{O}_{17}$ , and (c)  $n=5$   $\text{Ba}_6(\text{Co,Ga})_{13}\text{O}_{26}$ . (d) Structure of  $\text{Ba}_2\text{Co}_4\text{XO}_7$  ( $X$ = halogen) which exhibits the same  $\text{BaCo}_8\text{O}_8$  building block (Figure below).

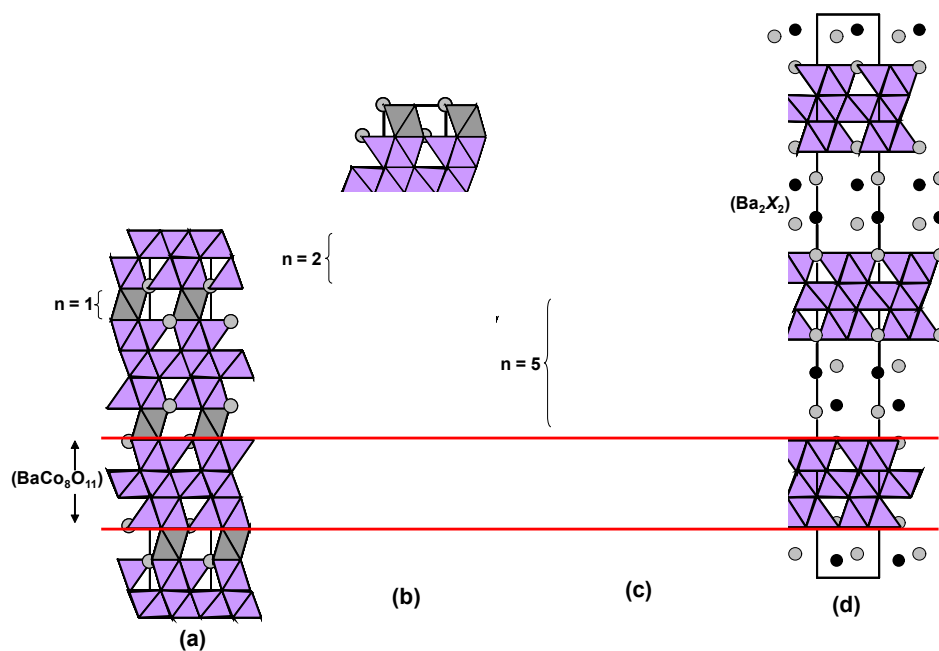

## S2: Geometry optimization of the experimental n= 2 term (Ba<sub>3</sub>Co<sub>10</sub>O<sub>17</sub>)

The full relaxations (atomic positions and cell parameters) using GGA only (S1a,c) lead to a good agreement with the experimental structures. The same relaxation using spin-polarized calculations with a ferromagnetic unit cell (S1b) in the case of n= 2 leads to slightly smaller error percentages. A careful analysis of the distances show a good agreement between experience and optimization, all percentages of errors being lower than 5% in the case of non-spin-polarized calculations. Although the spin polarization slightly improve the errors, the non-spin-polarized calculations are sufficiently reasonable. Therefore, we have chosen to work without spin-polarization in order to avoid simplification on the magnetic configuration choice as it may affect the structure, especially for the hypothetical structures for which there is no comparison with experience.

**Table S2a.** Atomic positions after full relaxation of the experimental structure of Ba<sub>3</sub>Co<sub>10</sub>O<sub>17</sub>. The relaxed unit cell parameters are: a= 5.683 Å and c= 35.822 Å (Space group  $R\bar{3}m$ ). The deviations from experience are  $\leq 0.4\%$  for both unit cell parameters and  $\leq 1.5\%$  for all atomic positions.

| Atom | Wyck. | x      | y      | z      |
|------|-------|--------|--------|--------|
| Ba1  | 3a    | 0      | 0      | 0      |
| Ba2  | 6c    | 2/3    | 1/3    | 0.9329 |
| Co1  | 3b    | 1/3    | 2/3    | 1/6    |
| Co2  | 9d    | 5/6    | 1/6    | 1/6    |
| Co3  | 6c    | 0      | 0      | 0.3065 |
| Co4  | 6c    | 0      | 0      | 0.2322 |
| Co5  | 6c    | 2/3    | 1/3    | 0.2475 |
| O1   | 18h   | 0.6816 | 0.8408 | 0.1951 |
| O2   | 6c    | 0      | 0      | 0.1385 |
| O3   | 18h   | 0.4888 | 0.5112 | 0.4027 |
| O4   | 9e    | 1/2    | 1/2    | 0      |

**Table S2b.** Atomic positions after full relaxation of the experimental structure of Ba<sub>3</sub>Co<sub>10</sub>O<sub>17</sub> using spin-polarized (FM) calculations. The relaxed unit cell parameters are: a= 5.7217 Å and c= 35.8680 Å (Space group  $R\bar{3}m$ ). The deviations for both unit cell parameters and atomic positions compared to experience are all  $\leq 0.5\%$ .

| Atom | Wyck. | x   | y   | z      |
|------|-------|-----|-----|--------|
| Ba1  | 3a    | 0   | 0   | 0      |
| Ba2  | 6c    | 2/3 | 1/3 | 0.9330 |

|     |     |        |        |        |
|-----|-----|--------|--------|--------|
| Co1 | 3b  | 1/3    | 2/3    | 1/6    |
| Co2 | 9d  | 5/6    | 1/6    | 1/6    |
| Co3 | 6c  | 0      | 0      | 0.3056 |
| Co4 | 6c  | 0      | 0      | 0.2325 |
| Co5 | 6c  | 2/3    | 1/3    | 0.2471 |
| O1  | 18h | 0.6932 | 0.8466 | 0.1965 |
| O2  | 6c  | 0      | 0      | 0.1392 |
| O3  | 18h | 0.4878 | 0.5122 | 0.4022 |
| O4  | 9e  | 1/2    | 1/2    | 0      |

**S3. Optimized structures in terms  $n=2$  and  $n=3$  for both cubic and hexagonal packing using the calculations conditions chosen in S1 (simple GGA non spin-polarized).**

**Table S3a.** Structural parameters of the optimized  $n=2$  terms: cubic and hexagonal packing

| Unit cell parameters and space group  | Atom type | Wyckoff position | x        | y        | z        |
|---------------------------------------|-----------|------------------|----------|----------|----------|
| <i>Cubic packing</i>                  |           |                  |          |          |          |
| a= 5,690 Å<br>c= 35,937 Å<br>$R^3m$   | Ba1       | -3m              | 0        | 0        | 0        |
|                                       | Ba2       | 3m               | 0,666667 | 0,333333 | 0,93188  |
|                                       | Co1       | 2/m              | 0,833333 | 0,166667 | 0,166667 |
|                                       | Co2       | 3m               | 0        | 0        | 0,30605  |
|                                       | Co3       | 3m               | 0        | 0        | 0,23147  |
|                                       | Co4       | -3m              | 0,333333 | 0,666667 | 0,166667 |
|                                       | Co5       | 3m               | 0,666667 | 0,333333 | 0,24519  |
|                                       | O1        | m                | 0,692    | 0,846    | 0,19704  |
|                                       | O2        | 3m               | 0        | 0        | 0,14     |
|                                       | O3        | m                | 0,4877   | 0,5123   | 0,4023   |
|                                       | O4        | 2/m              | 0,5      | 0,5      | 0        |
| <i>Hexagonal packing</i>              |           |                  |          |          |          |
| a= 5,6848Å<br>c= 24,1882 Å<br>$P^3m1$ | Ba1       | 3m               | 0        | 0        | 0,153608 |
|                                       | Ba2       | 3m               | 0        | 0        | 0,345192 |
|                                       | Ba3       | 3m               | 0,333333 | 0,666667 | 0,249889 |
|                                       | Co1       | 3m               | 0,666667 | 0,333333 | 0,300232 |
|                                       | Co2       | 3m               | 0,666667 | 0,333333 | 0,199459 |
|                                       | Co3       | 3m               | 0,333333 | 0,666667 | 0,379409 |
|                                       | Co4       | 3m               | 0,666667 | 0,333333 | 0,095662 |
|                                       | Co5       | -3m              | 0        | 0        | 0        |
|                                       | Co6       | -3m              | 0        | 0        | 0,5      |
|                                       | Co7       | 2/m              | 0,5      | 0        | 0        |
|                                       | Co8       | 2/m              | 0,5      | 0        | 0,5      |
|                                       | Co9       | 3m               | 0,333333 | 0,666667 | 0,120708 |
|                                       | Co10      | 3m               | 0,666667 | 0,333333 | 0,404125 |
|                                       | O1        | 3m               | 0,333333 | 0,666667 | 0,041798 |
|                                       | O2        | 3m               | 0,333333 | 0,666667 | 0,458129 |
|                                       | O3        | m                | 0,512809 | 0,025619 | 0,144037 |
|                                       | O4        | m                | 0,512585 | 0,025169 | 0,355814 |
|                                       | O5        | m                | 0,826469 | 0,173531 | 0,457999 |
| O6                                    | m         | 0,347469         | 0,173735 | 0,041886 |          |

|  |    |   |          |          |          |
|--|----|---|----------|----------|----------|
|  | O7 | m | 0,816796 | 0,183204 | 0,249844 |
|--|----|---|----------|----------|----------|

**Table S3b.** Structural parameters of the optimized  $n=3$  terms: cubic and hexagonal packing

| Unit cell parameters and space group          | Atom type | Wyckoff position | x        | y        | z        |
|-----------------------------------------------|-----------|------------------|----------|----------|----------|
| <i>Cubic packing</i>                          |           |                  |          |          |          |
| a= 5.665370Å<br>c= 14.283940Å<br>$P\bar{3}m1$ | Ba1       | 3m               | 0.000000 | 0.000000 | 0.256980 |
|                                               | Ba2       | 3m               | 0.333333 | 0.666667 | 0.426720 |
|                                               | Co1       | 3m               | 0.333333 | 0.666667 | 0.645930 |
|                                               | Co2       | -3m              | 0.000000 | 0.000000 | 0.500000 |
|                                               | Co3       | 3m               | 0.333333 | 0.666667 | 0.835720 |
|                                               | Co4       | -3m              | 0.000000 | 0.000000 | 0.000000 |
|                                               | Co5       | 2/m              | 0.500000 | 0.000000 | 0.000000 |
|                                               | Co6       | 3m               | 0.333333 | 0.666667 | 0.203720 |
|                                               | O1        | 3m               | 0.333333 | 0.666667 | 0.071400 |
|                                               | O2        | m                | 0.511320 | 0.022650 | 0.242480 |
| O3                                            | m         | 0.174060         | 0.825940 | 0.928720 |          |
| O4                                            | m         | 0.835380         | 0.164620 | 0.415040 |          |
| <i>Hexagonal packing</i>                      |           |                  |          |          |          |
| a=5.6953 Å<br>c= 43.3004 Å<br>$R\bar{3}m$     | Ba1       | 6c               | 2/3      | 1/3      | 0.24588  |
|                                               | Ba2       | 6c               | 2/3      | 1/3      | 0.14600  |
|                                               | Co1       | 3a               | 0        | 0        | 0        |
|                                               | Co2       | 9e               | 1/2      | 1/2      | 0        |
|                                               | Co3       | 6c               | 1/3      | 2/3      | 0.22310  |
|                                               | Co4       | 6c               | 1/3      | 2/3      | 0.28048  |
|                                               | Co5       | 6c               | 0        | 0        | 0.26519  |
|                                               | Co6       | 3b               | 1/3      | 2/3      | 1/6      |
|                                               | O1        | 18h              | 0.63997  | 0.81998  | 0.25366  |
|                                               | O2        | 6c               | 2/3      | 1/3      | 0.02365  |
|                                               | O3        | 18h              | 0.65253  | 0.82626  | 0.02316  |
|                                               | O4        | 18h              | 0.18398  | 0.81602  | 0.13789  |

#### S4. Comparison of the density of states (DOS) projected on the $d$ states of Co atoms for different terms and stacking type ( $h$ or $c$ ).

**Figure S4 below:** Topologies of the Density of States (DOS) projected on the cobalt  $d$  states for each type of cobalt atom sites for rows (a) the  $n= 1$  experimental term  $\text{Ba}_2\text{Co}_9\text{O}_{14}$ , (b) the  $n= 2c$  (cubic) experimental phase (C- $\text{Ba}_3\text{Co}_{10}\text{O}_{17}$ ), (c) the  $n= 2h$  (hexagonal) hypothetical phase (H- $\text{Ba}_3\text{Co}_{10}\text{O}_{17}$ ), (d) for the  $n= 3c$  hypothetical term C- $\text{Ba}_4\text{Co}_{11}\text{O}_{20}$  and (e) for the  $n= 3h$  hypothetical term H- $\text{Ba}_4\text{Co}_{11}\text{O}_{20}$ . The DOS were calculated for a simple ferromagnetic unit cell in the GGA approximation. DFT+U calculations were not employed to avoid any artificial stabilization of high spin states.

The Fermi level is indicated by vertical dotted lines. Spins *up* and *down* are represented as  $\uparrow$  and  $\downarrow$ , respectively.

The plots are annotated with the corresponding Co atom as follows:

- For the  $[\text{BaCo}_6\text{O}_9]$  block (first three columns): Co(Td) corresponds to the tetrahedral sites. Co(Oh  $\text{CoO}_2$ ) corresponds to the magnetic atomic sites within the  $\text{CdI}_2$  type layer (edge sharing octahedrons layer). Co(Oh  $\text{CoO}_2$  non mag) corresponds to the non-magnetic atomic sites within the same  $\text{CdI}_2$  type layer.
- For the  $[\text{Ba}_n\text{Co}_{2+n}\text{O}_{3n+2}]$  block (three last columns): Co(Oh central) corresponds to the central Oh in the perovskite layer. Co(Oh edge) corresponds to the octahedral site within the layer of polyhedrons involving tetrahedrons and the Co(Oh edge) sandwiched between the  $\text{CdI}_2$  type layer and the other octahedrons of the perovskite layer. Co(Oh intermed.) is used to account for the additional site in the perovskite block for the  $n= 3$  terms, located between the Co(Oh central) and the Co(Oh edge).

The disposition into columns of analogous sites allows a direct comparison. The spin states (HS/LS) are indicated in red for the sites holding variations within the series.



## S5. XPS measurements

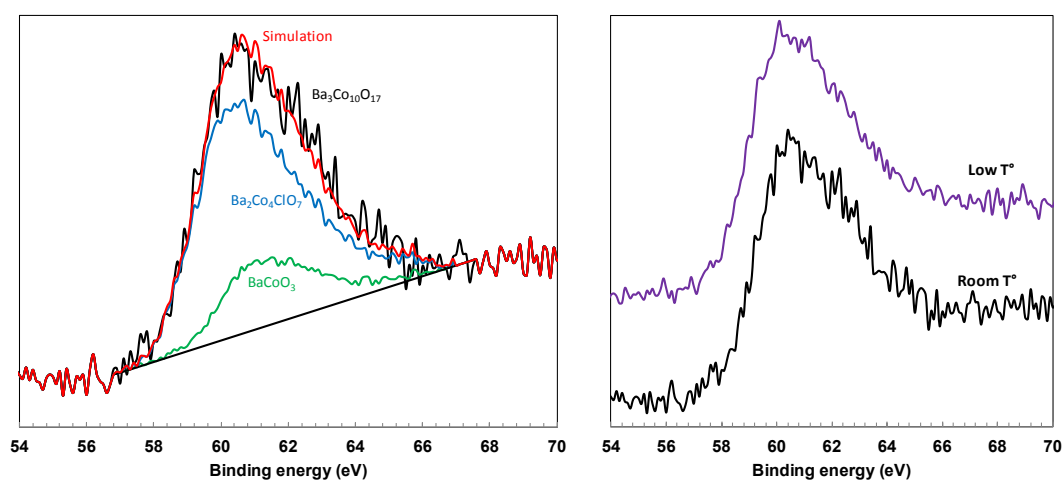

**Figure S5.** XPS measurements. (left) Spectra of  $\text{Ba}_3\text{Co}_{10}\text{O}_{17}$  (black), of the references  $\text{BaCoO}_3$  (green) and  $\text{Ba}_2\text{Co}_4\text{ClO}_7$  (blue), and simulation of  $\text{Ba}_3\text{Co}_{10}\text{O}_{17}$  using both references (red). (right) Comparison between the low temperature and room temperature measurements

## S6. Additional experimental details of the low temperature single crystal XRD

The sample is glued to a quartz fiber and centered on a two-axis mini-goniometer magnetically coupled to the diffractometer  $\varphi$  axis. The coupling is achieved by mounting a master magnet in place of the usual goniometer head. The mini goniometer is inserted inside an orange-type LHe bath cryostat which is supported independently from the diffractometer and equipped for crystal centering in the x-ray beam, the crystal being observed either optically through mylar windows or by its x-ray absorption and/or diffraction signal. The cryostat can be rotated about the vertical axis by  $30^\circ$  steps. It is equipped with a flat Be exit window allowing to use the full active surface of the detector at a minimum sample-detector distance of 35mm. Here, the normal to the cryostat exit window was rotated at  $30^\circ$  from the direct x-ray beam, and the detector was placed at a fixed  $\theta=15^\circ$  position.
